# Supplementary material for: A colorimetric sensing platform based on site-specific endonuclease IV-aided signal amplification for the detection of DNA related to the human immunodeficiency virus
Source: Royal Society of Chemistry journal article supplement (doi:10.1039/c9ay00191c), 2019-01-01
Supplement: c9ay00191c1.pdf [file c9ay00191c1.pdf]

**A Simple Colorimetric Sensing Platform Based on Site-Specific  
Endonuclease IV-Aided Signal Amplification for the Detection of  
DNA Related to the Human Immunodeficiency Virus**

*Xiaqing Wang, Zhijun Huang, Junman Chen, Zewei Luo, Ya Xu and Yixiang Duan\**

**SUPPORTING INFORMATION FILE**

| <b>Page</b> | <b>Contents</b>                                                                    |
|-------------|------------------------------------------------------------------------------------|
| S1          | The sequences of oligonucleotides employed in the sensing platform                 |
| S2          | Optimization of key parameters                                                     |
| S3          | Comparison of the performance of the proposed method with the reported literatures |
| S4          | Detection of the targeted DNA in human serum with the proposed method              |
| S5          | References                                                                         |

**Table S1** The sequences of oligonucleotides employed in the sensing platform

| Name     | Sequence (from 5'- 3')                                        |
|----------|---------------------------------------------------------------|
| Target   | GCTAGAGATTTTCCACACTGACT                                       |
| LFSP 1   | AACCC AGTCAGTGTGGAAAATCTCTAGC<br>GGGTTGGGCGGGATGGG            |
| Strand 1 | CTAGCGGGTTGGGCGGGATGGG                                        |
| Strand 2 | AACCCAGTCAGTGTGGAAAATC                                        |
| LFSP 2   | CAACCC AGTCAGTGTGGAAAATCTCTAGC<br>GGGTTGGGCGGGATGGG           |
| Strand 3 | CAACCCAGTCAGTGTGGAAAATC                                       |
| LFSP 3   | CCAACCC AGTCAGTGTGGAAAATCTCTAGC<br>GGGTTGGGCGGGATGGG          |
| Strand 4 | CCAACCCAGTCAGTGTGGAAAATC                                      |
| LFSP 4   | CCAACCC AGTCAGTGTGGAAAATCTCTAGC<br>GGGTTGGGCGGGATGGG          |
| Strand 5 | CCAACCCAGTCAGTGTGGAAAATC                                      |
| LFSP 5   | GCCAACCC AGTCAGTGTGGAAAATCTCTA<br>GCGGGTTGGGCGGGATGGG         |
| Strand 6 | GCCAACCCAGTCAGTGTGGAAAATC                                     |
| SP 1     | CCAACCC AGTCAATG <b>X</b> GGAAAATCTCTAGC<br>GGGTTGGGCGGGATGGG |
| SP 2     | CCAACCC AGTCAGTGTGGAA <b>X</b> TCTCTAGC<br>GGGTTGGGCGGGATGGG  |
| SP 3     | CCAACCC AGTCAGTGTGGAAAATCACT <b>X</b> GC<br>GGGTTGGGCGGGATGGG |
| MT 1     | TTTTTTTTTTTTTTTTTTTTTTTTTT                                    |
| MT 2     | <u>G</u> ATAGAAATTTTCCACACTGACT                               |
| MT 3     | GCTAGAT <u>A</u> ATTTTCCACACTGACT                             |

**X** represents the abasic sites, and the underlined bases denote mismatched bases.

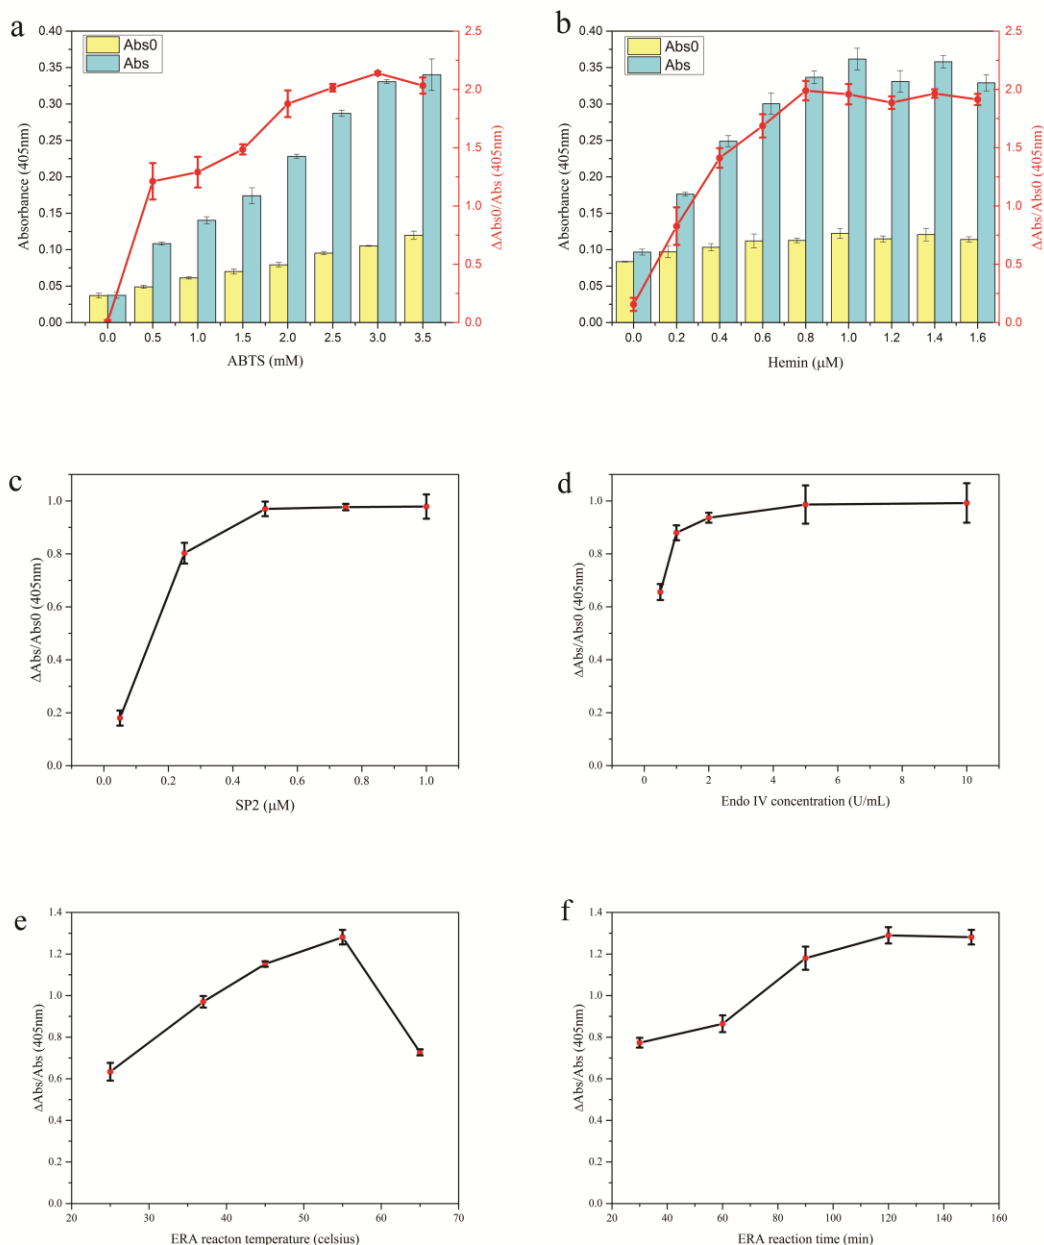

**Figure S1** The effect of the concentration of (a) ABTS and (b) hemin on the signal.

Reaction conditions: 100 nM of five label-free signal probes and corresponding five

pairs of fragments, 5 mM H<sub>2</sub>O<sub>2</sub>; The effect of the concentration of (c) SP 2 and (d)

Endo IV on the signal. Reaction conditions: 50 nM targeted DNA, 3 mM ABTS, 0.8

μM hemin, 5 mM H<sub>2</sub>O<sub>2</sub>, Endo IV-aided signal amplification reaction temperature and

time are 37 °C and 2.5 hours, respectively; The effect of Endo IV-aided signal

amplification reaction (e) temperature and (f) time on the signal. Reaction conditions:

3 mM ABTS, 0.8  $\mu$ M hemin, 5 mM H<sub>2</sub>O<sub>2</sub>, 0.5  $\mu$ M SP 2, 50 nM targeted DNA, 5 U mL<sup>-1</sup> Endo IV. Notice: in Fig. S1c, d, e, f, Abs and Abs0 were the values of absorbance intensity at 405 nm in the presence and absence of the targeted DNA, respectively. However, in Fig. S1a, b, Abs and Abs0 show the values of absorbance intensity at 405 nm, which was generated by the synthesized primers (LFSP 3, strand 1 and strand 4) to simulate backgrounds and signals

**Table S2** Comparison of the performance of the proposed method with the reported literatures

| Sensing element      | Transducer used | Detection range | LOD           | Ref.      |
|----------------------|-----------------|-----------------|---------------|-----------|
| DNAzyme/thioflavin T | Fluorescence    | 2.4-200 nM      | 2.4 nM        | 1         |
| DNAzyme/AgNCs        | Fluorescence    | 0.053-2 $\mu$ M | 0.053 $\mu$ M | 2         |
| DNAzyme              | Colorimetric    | 9.48-100 nM     | 9.48 nM       | 3         |
| DNAzyme              | Colorimetric    | 4-50 nM         | 4 nM          | 4         |
| DNAzyme              | Colorimetric    | 1.2-120 nM      | 1.2 nM        | This work |

**Table S3** Detection of the targeted DNA in human serum with the proposed method

| Target DNA added (nmol/L) | Detected by the Sensing platform (nmol/L) | Spiked recovery (%) | RSD (%) |
|---------------------------|-------------------------------------------|---------------------|---------|
| 40                        | 46.3                                      | 115.8               | 2.20    |
| 80                        | 78.35                                     | 97.9                | 2.02    |
| 120                       | 109.79                                    | 91.5                | 3.53    |

The data was calculated based on the standard curve and all the data were of three independent repeats.

## References

1. X. F. Zhang, H. M. Xu, L. Han, N. B. Li and H. Q. Luo, *Anal. Sci.*, 2018, **34**, 149-153.
2. M. Wang, W. Wang, C. Liu, J. Liu, T. S. Kang, C. H. Leung and D. L. Ma, *Materials Chemistry Frontiers*, 2016,**1**,128-131.
3. N. Shahbazi, S. Hosseinkhani, K. Khajeh and B. Ranjbar, *Biopolymers*, 2017, **107**.
4. K. Nakatsuka, H. Shigeto, A. Kuroda and H. Funabashi, *Biosens. Bioelectron.*, 2015, **74**, 222-226.
